# Supplementary material for: Intelligent De Novo Design of Novel Antimicrobial Peptides against Antibiotic-Resistant Bacteria Strains
Source: MDPI journal article supplement (doi:10.3390/ijms24076788), 2023-04-05
Supplement: s1 [file s1]

## Table of Contents of Supplementary Figures

|                        |   |
|------------------------|---|
| <b>Figure S1</b> ..... | 1 |
| <b>Figure S2</b> ..... | 2 |
| <b>Figure S3</b> ..... | 3 |
| <b>Figure S4</b> ..... | 4 |
| <b>Figure S5</b> ..... | 5 |
| <b>Figure S5</b> ..... | 6 |

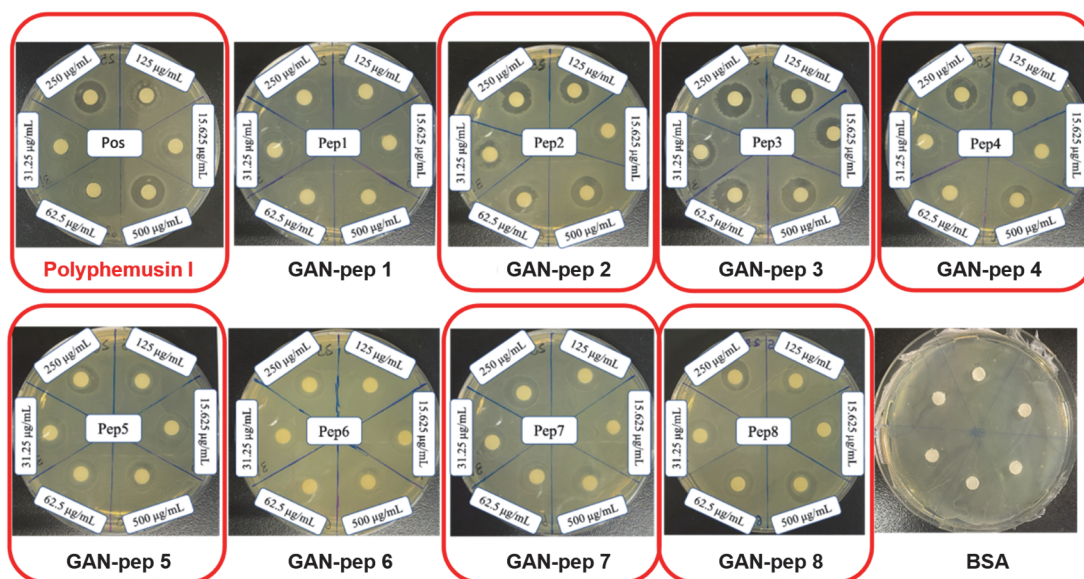

**Figure S1.** Growth inhibition test against *E. coli* with peptides at different concentrations. Peptides are highlighted with red rectangles if inhibition zones occur around the disks. Here, polyphemus I is a known AMP with broad-spectrum activity against various microorganisms as a positive control.

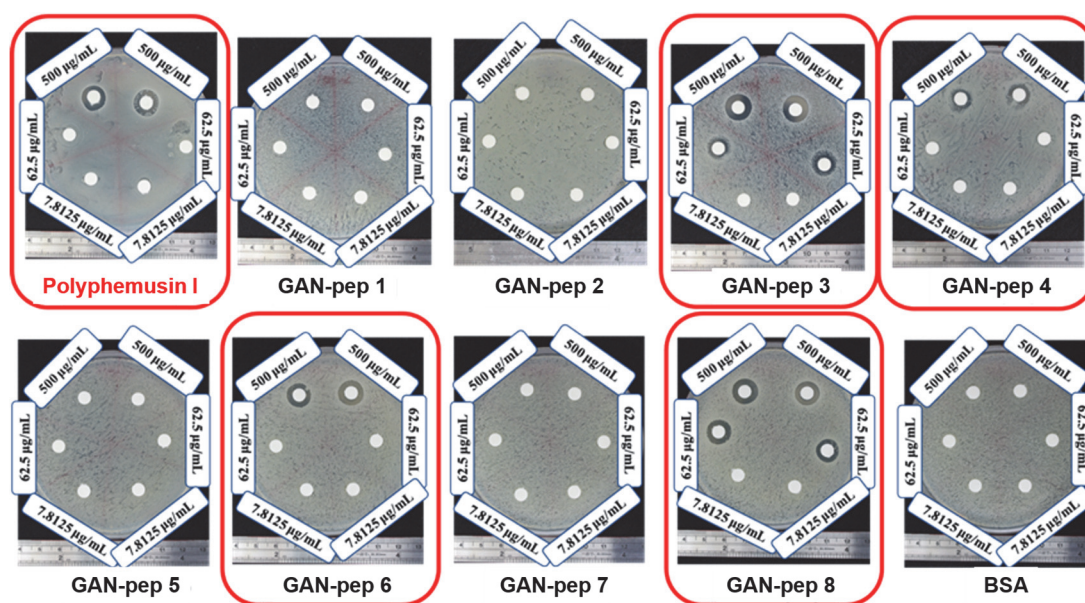

**Figure S2.** Growth inhibition test against methicillin-susceptible *S. aureus* (MSSA) with peptides at different concentrations. Peptides are highlighted with red rectangles if inhibition zones occur around the disks. Here, polyphemusin I is a known AMP with broad-spectrum activity against various microorganisms as a positive control.

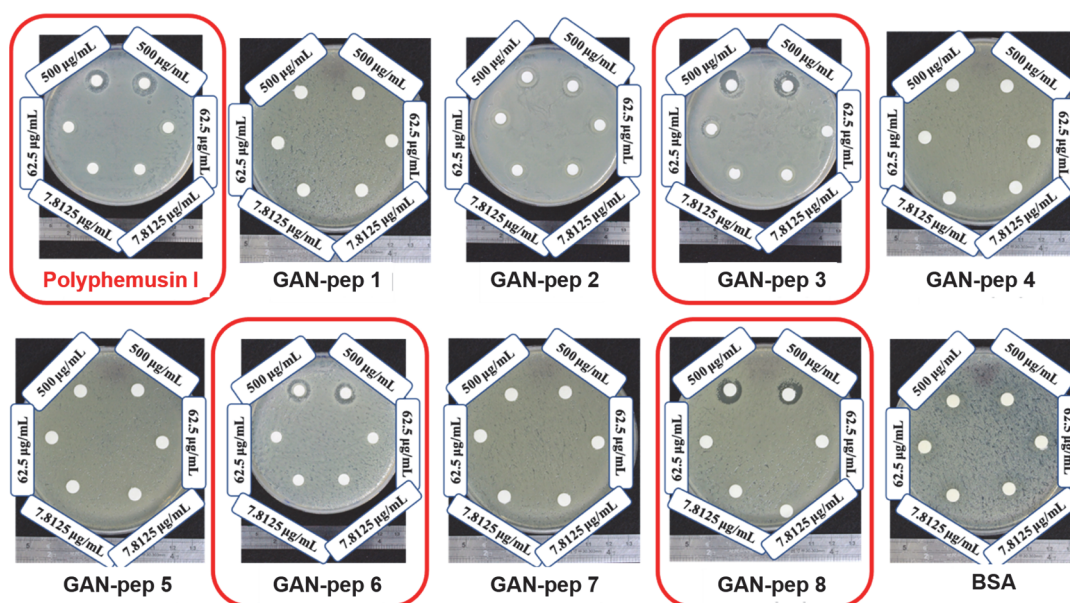

**Figure S3.** Growth inhibition test against methicillin-resistant *S. aureus* (MRSA) with peptides at different concentrations. Peptides are highlighted with red rectangles if inhibition zones occur around the disks. Here, polyphemusin I is a known AMP with broad-spectrum activity against various microorganisms as a positive control.

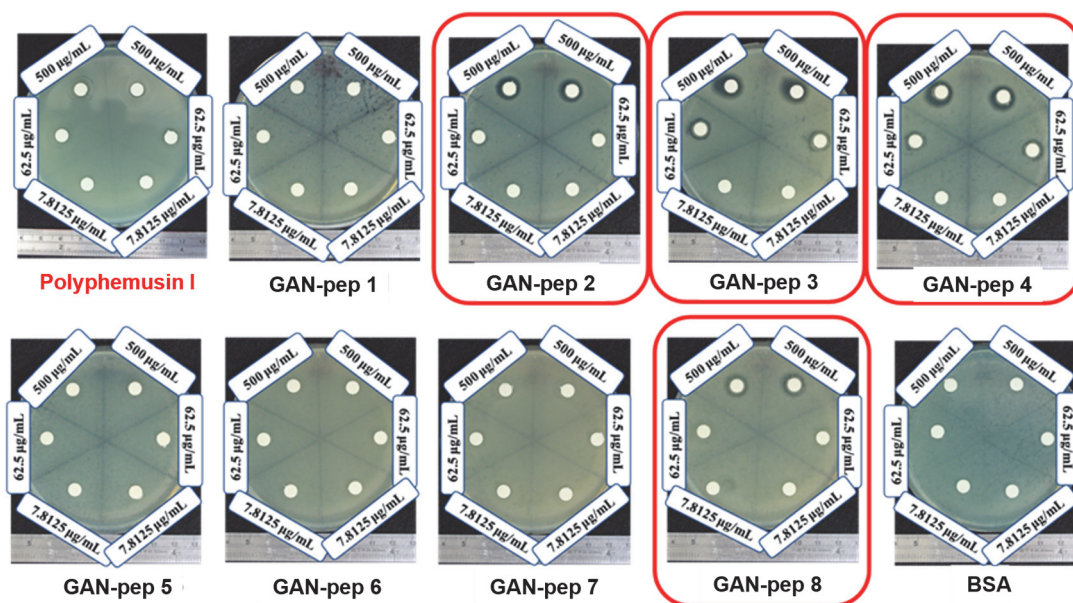

**Figure S4.** Growth inhibition test against carbapenem-susceptible *P. aeruginosa* with peptides at different concentrations. Peptides are highlighted with red rectangles if inhibition zones occur around the disks. Here, polyphemusin I is a known AMP with broad-spectrum activity against various microorganisms.

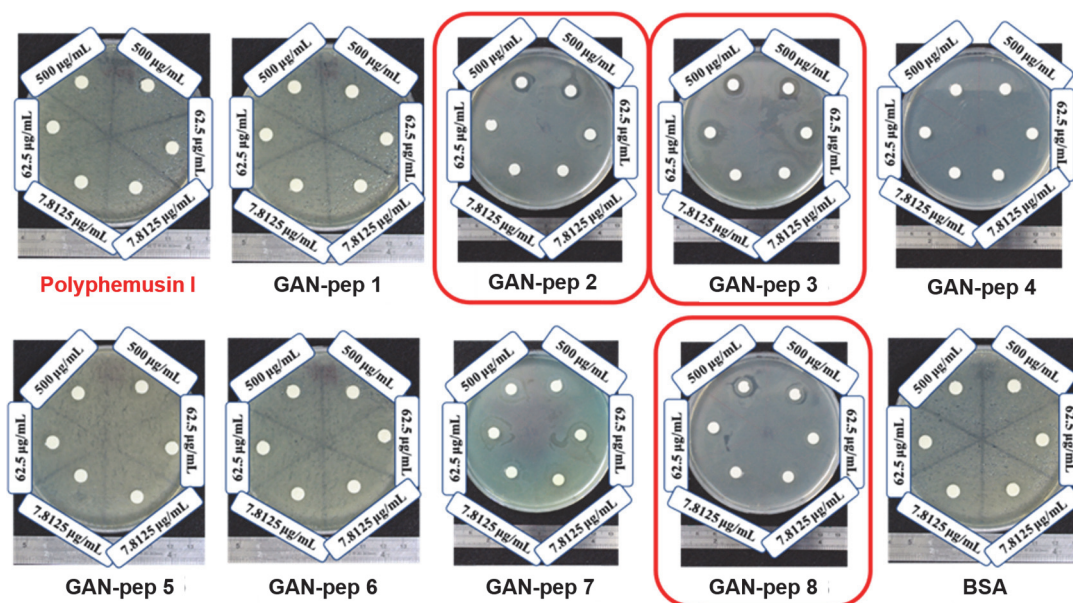

**Figure S5.** Growth inhibition test against carbapenem-resistant *P. aeruginosa* with peptides at different concentrations. Peptides are highlighted with red rectangles if inhibition zones occur around the disks. Here, polyphemusin I is a known AMP with broad-spectrum activity against various microorganisms.

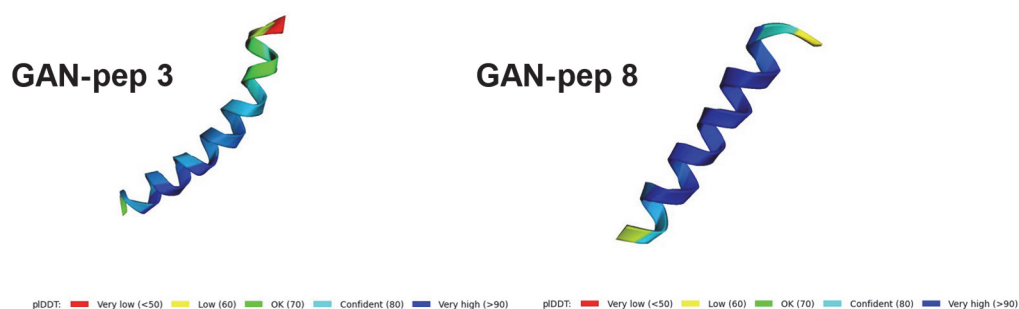

**Figure S6.** The structure prediction in alphafold2 and GAN-pep 3 and 8 show the helix structures. pLDDT stands for predicted local distance difference test score in AlphaFold2. It is a measure used to evaluate the accuracy and reliability of protein structure predictions generated by deep learning models. pLDDT scores range from 0 to 100, with higher scores represented in cyan and blue, indicating better model accuracy.
